# Supplementary material for: Single Cell Analysis of ACE2 Expression Reveals the Potential Targets for 2019-nCoV
Source: Preprints.org preprint supplement (doi:10.20944/preprints202002.0221.v1), 2020-02-16
Supplement: Supplementary file 1 [file supplementary]

# Supplementary information

## Single cell analysis of ACE2 expression reveals the potential targets for 2019-nCov

Yanyan Zhu<sup>1,a</sup>, Miaomiao Jiang<sup>2,a</sup>, Liang Gao<sup>3,\*</sup>, Xiaoyun Huang<sup>2,\*</sup>

<sup>1</sup> Department of Oncology, Henan Provincial People's Hospital; Zhengzhou University People's Hospital, Zhengzhou, Henan, 450003, China

<sup>2</sup> Zhiyu Center for Systems Biology, Zhiyu Inc., Shenzhen, China

<sup>3</sup> The Brain Cognition and Brain Disease Institute, ShenZhen Institutes of Advanced Technology, Chinese Academy of Sciences, 1068 Xueyuan Avenue, Shenzhen 518055, China

<sup>a</sup>Those authors contribute equally.

\*Corresponding author: liang.gao@siat.ac.cn (Liang Gao) and stemidea@gmail.com (Xiaoyun Huang)

## Supplementary Figures

| Cell type (lung)     | ACE2 | Cells | % of cells expressed |
|----------------------|------|-------|----------------------|
| Alveolar_Type1       | 3    | 764   | 0.3927               |
| Alveolar_Type2       | 79   | 4676  | 1.6895               |
| B_cells              | 0    | 1551  | 0.0000               |
| Blood_vessel         | 2    | 2694  | 0.0742               |
| Ciliated             | 2    | 466   | 0.4292               |
| DC_1                 | 0    | 163   | 0.0000               |
| DC_2                 | 0    | 1605  | 0.0000               |
| DC_Monocyte_Dividing | 0    | 242   | 0.0000               |
| DC_activated         | 0    | 122   | 0.0000               |
| DC_plasmacytoid      | 0    | 46    | 0.0000               |
| Fibroblast           | 13   | 4624  | 0.2811               |
| Lymph_vessel         | 0    | 337   | 0.0000               |
| Macrophage_Dividing  | 0    | 94    | 0.0000               |
| Macrophage_MARCOneg  | 0    | 937   | 0.0000               |
| Macrophage_MARCOpos  | 0    | 4512  | 0.0000               |
| Mast_cells           | 0    | 2911  | 0.0000               |
| Monocyte             | 0    | 6067  | 0.0000               |
| Muscle_cells         | 1    | 839   | 0.1192               |
| NK                   | 0    | 10418 | 0.0000               |
| NK_Dividing          | 0    | 130   | 0.0000               |
| Plasma_cells         | 1    | 287   | 0.3484               |
| T_CD4                | 0    | 7211  | 0.0000               |
| T_CD8_CytT           | 1    | 5755  | 0.0174               |
| T_cells_Dividing     | 0    | 88    | 0.0000               |
| T_regulatory         | 0    | 481   | 0.0000               |

Figure 1: ACE2 expression in the lung.

| <b>Cell type (mature)</b>             | <b>ACE2</b> | <b>Cells</b> | <b>% of cells expressed</b> |
|---------------------------------------|-------------|--------------|-----------------------------|
| Ascending vasa recta endothelium      | 1           | 300          | 0.3333                      |
| B cell                                | 1           | 975          | 0.1026                      |
| CD4 T cell                            | 12          | 2435         | 0.4928                      |
| CD8 T cell                            | 7           | 991          | 0.7064                      |
| Connecting tubule                     | 1           | 157          | 0.6369                      |
| Descending vasa recta endothelium     | 2           | 192          | 1.0417                      |
| Distinct proximal tubule 1            | 12          | 65           | 18.4615                     |
| Distinct proximal tubule 2            | 14          | 151          | 9.2715                      |
| Epithelial progenitor cell            | 4           | 238          | 1.6807                      |
| Fibroblast                            | 0           | 23           | 0.0000                      |
| Glomerular endothelium                | 1           | 622          | 0.1608                      |
| Indistinct intercalated cell          | 3           | 429          | 0.6993                      |
| MNP-a/classical monocyte derived      | 3           | 555          | 0.5405                      |
| MNP-b/non-classical monocyte derived  | 2           | 375          | 0.5333                      |
| MNP-c/dendritic cell                  | 1           | 220          | 0.4545                      |
| MNP-d/Tissue macrophage               | 0           | 87           | 0.0000                      |
| Mast cell                             | 0           | 41           | 0.0000                      |
| Myofibroblast                         | 0           | 122          | 0.0000                      |
| NK cell                               | 13          | 1322         | 0.9834                      |
| NKT cell                              | 4           | 733          | 0.5457                      |
| Neutrophil                            | 0           | 46           | 0.0000                      |
| Pelvic epithelium                     | 3           | 136          | 2.2059                      |
| Peritubular capillary endothelium 1   | 1           | 666          | 0.1502                      |
| Peritubular capillary endothelium 2   | 2           | 185          | 1.0811                      |
| Plasmacytoid dendritic cell           | 0           | 23           | 0.0000                      |
| Podocyte                              | 3           | 126          | 2.3810                      |
| Principal cell                        | 0           | 88           | 0.0000                      |
| Proliferating Proximal Tubule         | 21          | 348          | 6.0345                      |
| Proximal tubule                       | 2325        | 27497        | 8.4555                      |
| Thick ascending limb of Loop of Henle | 5           | 675          | 0.7407                      |
| Transitional urothelium               | 0           | 45           | 0.0000                      |
| Type A intercalated cell              | 3           | 275          | 1.0909                      |
| Type B intercalated cell              | 3           | 125          | 2.4000                      |

Figure 2: ACE2 expression in the mature kidney.

| Cell type (fetal)                  | ACE2 | Cells | % of cells expressed |
|------------------------------------|------|-------|----------------------|
| B cell                             | 0    | 258   | 0.0000               |
| CD4 T cell                         | 0    | 440   | 0.0000               |
| CD8 T cell                         | 0    | 73    | 0.0000               |
| CNT/PC - proximal UB               | 6    | 575   | 1.0435               |
| Cap mesenchyme                     | 7    | 3557  | 0.1968               |
| Distal S shaped body               | 1    | 554   | 0.1805               |
| Distal renal vesicle               | 1    | 494   | 0.2024               |
| Endothelium                        | 2    | 1221  | 0.1638               |
| Erythroid                          | 0    | 35    | 0.0000               |
| Fibroblast 1                       | 1    | 673   | 0.1486               |
| Fibroblast 2                       | 0    | 371   | 0.0000               |
| Innate like lymphocyte             | 0    | 177   | 0.0000               |
| Loop of Henle                      | 1    | 121   | 0.8264               |
| Macrophage 1                       | 3    | 1543  | 0.1944               |
| Macrophage 2                       | 5    | 648   | 0.7716               |
| Mast cells                         | 0    | 85    | 0.0000               |
| Medial S shaped body               | 76   | 742   | 10.2426              |
| Megakaryocyte                      | 1    | 124   | 0.8065               |
| Monocyte                           | 5    | 783   | 0.6386               |
| Myofibroblast 1                    | 8    | 1742  | 0.4592               |
| Myofibroblast 2                    | 0    | 440   | 0.0000               |
| NK cell                            | 1    | 707   | 0.1414               |
| Neuron                             | 0    | 25    | 0.0000               |
| Neutrophil                         | 0    | 229   | 0.0000               |
| Pelvic epithelium - distal UB      | 1    | 170   | 0.5882               |
| Podocyte                           | 0    | 278   | 0.0000               |
| Proliferating B cell               | 1    | 128   | 0.7813               |
| Proliferating NK cell              | 0    | 67    | 0.0000               |
| Proliferating cDC2                 | 1    | 224   | 0.4464               |
| Proliferating cap mesenchyme       | 7    | 1560  | 0.4487               |
| Proliferating distal renal vesicle | 5    | 725   | 0.6897               |
| Proliferating fibroblast           | 0    | 66    | 0.0000               |
| Proliferating macrophage           | 1    | 359   | 0.2786               |
| Proliferating monocyte             | 0    | 149   | 0.0000               |
| Proliferating myofibroblast        | 3    | 470   | 0.6383               |
| Proliferating stroma progenitor    | 2    | 717   | 0.2789               |
| Proximal S shaped body             | 3    | 622   | 0.4823               |
| Proximal UB                        | 3    | 405   | 0.7407               |
| Proximal renal vesicle             | 0    | 280   | 0.0000               |
| Proximal tubule                    | 298  | 707   | 42.1499              |
| Stroma progenitor                  | 7    | 3841  | 0.1822               |
| cDC1                               | 0    | 83    | 0.0000               |
| cDC2                               | 2    | 646   | 0.3096               |
| pDC                                | 0    | 89    | 0.0000               |

Figure 3: ACE2 expression in the fetal kidney.



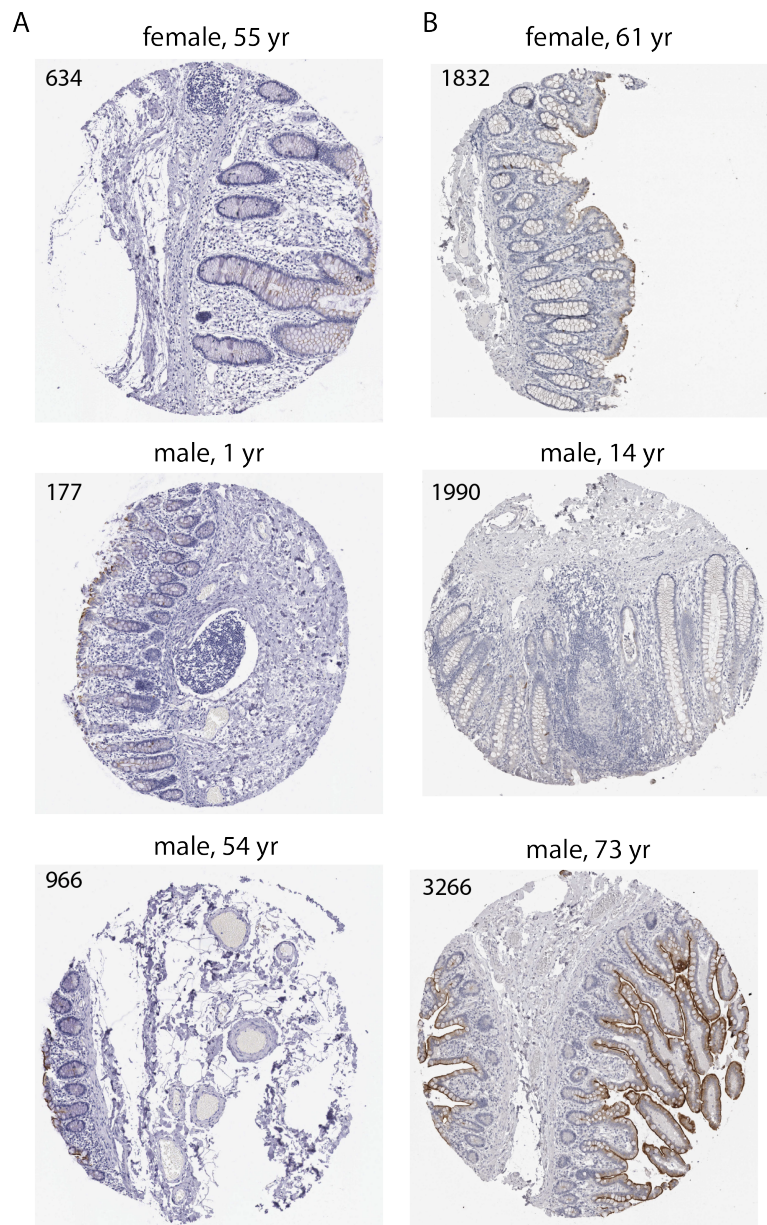

Figure 4: ACE2 expression in the colon. Normal colon tissues were stained with antibody HPA000288 (A) and CAB026174 (B). 25%-75% glandular cells displayed high intensity. Images are from the human protein atlas.

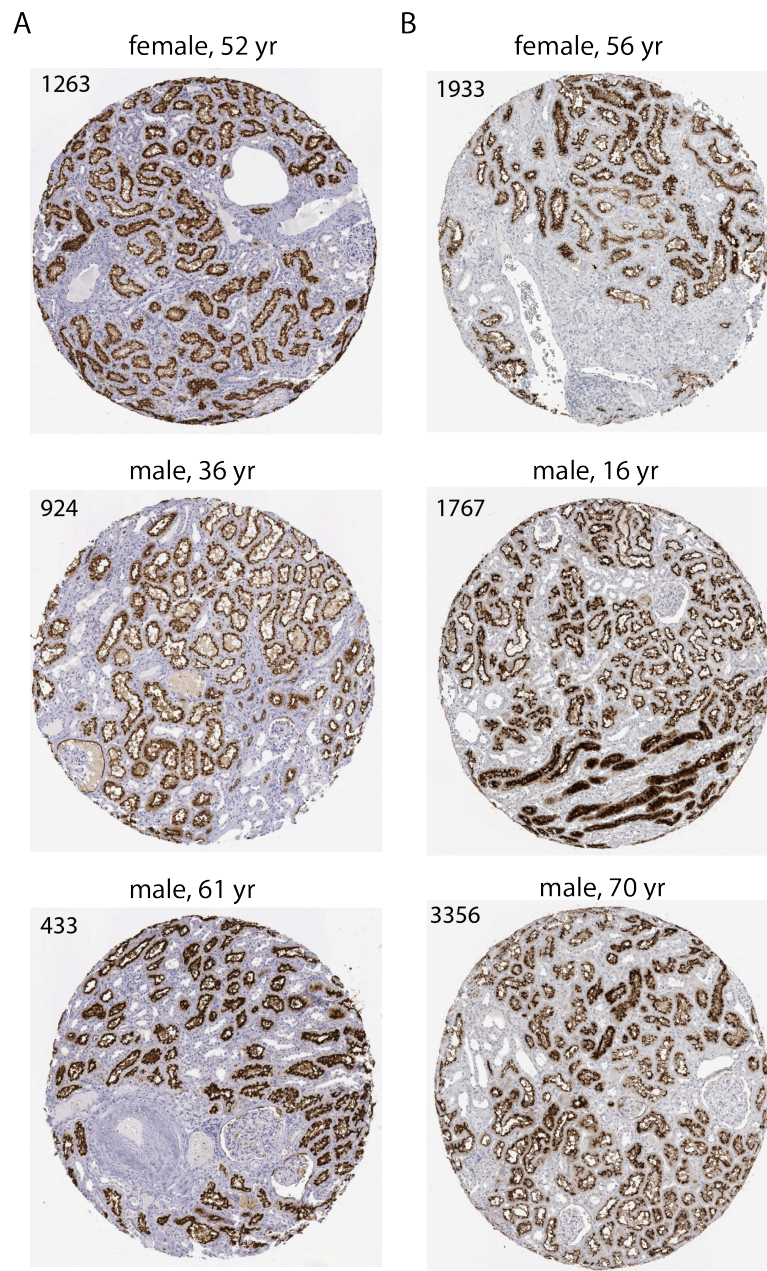

Figure 5: ACE2 expression at the protein level. Normal kidney tissues were stained with antibody HPA000288 (A) and CAB026174 (B). 25%-75% cells in tubules displayed high intensity. Images are from the human protein atlas.
